# Supplementary material for: Spatial genomic heterogeneity in diffuse intrinsic pontine and midline high-grade glioma: implications for diagnostic biopsy and targeted therapeutics
Source: PubMed Central journal article supplement (PMC4700584; doi:10.1186/s40478-015-0269-0), 2016-01-04
Supplement: 40478_2015_269_MOESM5_ESM.pdf [file 40478_2015_269_MOESM5_ESM.pdf]

a.

|                                                                                                                         |                                                                                                                            |                                                                                                                           |                                                                                                                          |                                                                                                    |
|-------------------------------------------------------------------------------------------------------------------------|----------------------------------------------------------------------------------------------------------------------------|---------------------------------------------------------------------------------------------------------------------------|--------------------------------------------------------------------------------------------------------------------------|----------------------------------------------------------------------------------------------------|
| <p>Patient 1</p> 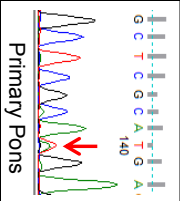 <p>Primary Pons</p> |  <p>Left Anterior Pons</p>              | <p>*</p>  <p>Right Posterior Pons</p> |  <p>Left Caudate</p>                 |  <p>Normal</p> |
| <p>Patient 4</p>  <p>Primary Pons</p>  | <p>*</p>  <p>Inferior Posterior Pons</p> |  <p>Left Anterior Pons</p>             | <p>*</p>  <p>Right Posterior Pons</p> |  <p>Normal</p>  |
| <p>Patient 5</p>  <p>Primary Pons</p>  |  <p>Left Anterior Pons</p>               | <p>*</p>  <p>Right Cerebral</p>        |  <p>Normal</p>                        |                                                                                                    |

b.

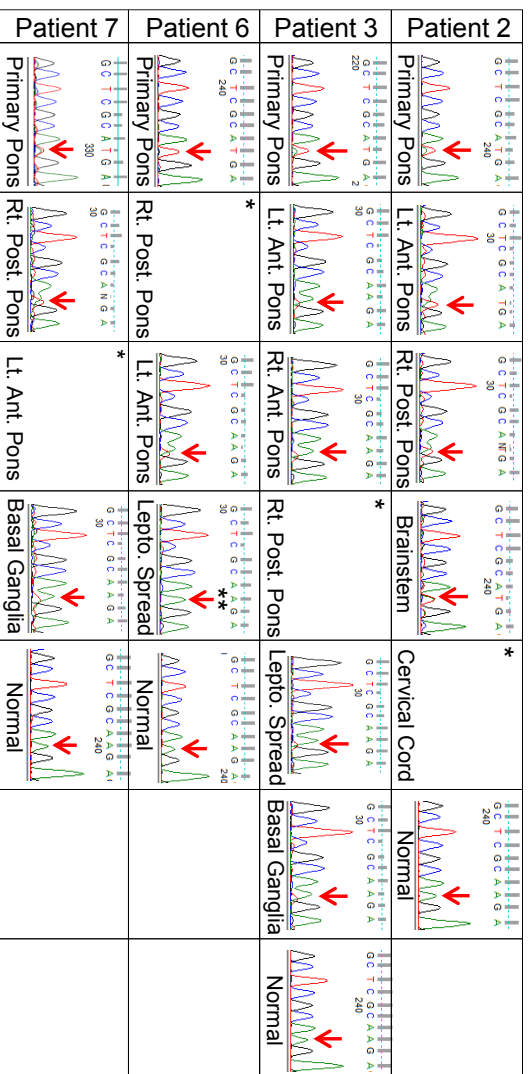

Online Resource 5. Chromats of sanger sequencing results for a) HIST1H3B and b)H3F3A K27M

**Article Title:** Spatial genomic heterogeneity in diffuse intrinsic pontine and midline high-grade glioma: implications for diagnostic biopsy and targeted therapeutics

**Journal Name:** Acta Neuropathologica

**Author Names:** Lindsey M. Hoffman<sup>1\*</sup>, Mariko DeWine<sup>1\*</sup>, Scott Ryall<sup>2\*</sup>, Pawel Buczkowicz<sup>2</sup>, James Leach<sup>1</sup>, Lill Miles<sup>1</sup>, Arun Raman<sup>2</sup>, Michael Brudno<sup>2</sup>, Shiva Senthil Kumar<sup>1</sup>, Rachid Drissi<sup>1</sup>, Phillip Dexheimer<sup>1</sup>, Ralph Salloum<sup>1</sup>, Lionel Chow<sup>1</sup>, Trent Hummel<sup>1</sup>, Charles Stevenson<sup>1</sup>, Qing Lu<sup>1</sup>, Blaise Jones<sup>1</sup>, David Witte<sup>1</sup>, Bruce Aronow<sup>1</sup>, Cynthia E. Hawkins<sup>2\*\*</sup>, Maryam Fouladi<sup>1\*\*\*</sup>

**Author Affiliations:** 1 – Cincinnati Children's Hospital Medical Center, Cincinnati, Ohio; 2 – The Hospital for Sick Children, Toronto, Canada

**Email of Corresponding Author:** maryam.fouladi@cchmc.org
