# Supplementary material for: Spatial genomic heterogeneity in diffuse intrinsic pontine and midline high-grade glioma: implications for diagnostic biopsy and targeted therapeutics
Source: Springer Nature journal article supplement (doi:10.1186/s40478-015-0269-0), 2016-01-04
Supplement: MOESM6 [file 25665856]

| Patient 3                                                                                 |                                                                                           | Patient 8                                                                                 |                                                                                            |                                                                                             |                                                                                            |
|-------------------------------------------------------------------------------------------|-------------------------------------------------------------------------------------------|-------------------------------------------------------------------------------------------|--------------------------------------------------------------------------------------------|---------------------------------------------------------------------------------------------|--------------------------------------------------------------------------------------------|
| 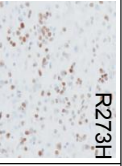 R273H |  R273H |  R273H |  R273H |  R273H |                                                                                            |
| Lt. Ant. Pons<br>R213*                                                                    | Rt. Ant. Pons<br>R213*                                                                    | Rt. Post. Pons<br>R248Q                                                                   | Lepto. Spread<br>R248Q                                                                     | Basal Ganglia                                                                               |                                                                                            |
|  G245S  |  G245S  |  G245S  |  G245S  |  G245S  |  G245S |
| Primary Pons                                                                              | Lepto. Spread                                                                             | Primary Pons                                                                              | Lepto. Spread                                                                              | Basal Ganglia                                                                               | Frontal Lobe                                                                               |
|  G245S   |  G245S   |  G245S   |  G245S   |  G245S   |  G245S  |
| Rt. Pons                                                                                  | Rt. Post. Pons                                                                            | Lt. Pons                                                                                  | Rt. Thalamus                                                                               | Basal Ganglia                                                                               | Frontal Lobe                                                                               |

### Online Resource 6. Immunohistochemistry validation of TP53 mutants

**Article Title:** Spatial genomic heterogeneity in diffuse intrinsic pontine and midline high-grade glioma: implications for diagnostic biopsy and targeted therapeutics

**Journal Name:** Acta Neuropathologica

**Author Names:** Lindsey M. Hoffman<sup>1\*</sup>, Mariko DeWired<sup>1\*</sup>, Scott Ryall<sup>2\*</sup>, Pawel Buczkowicz<sup>2\*</sup>, James Leach<sup>1</sup>, Lili Miles<sup>1</sup>, Arun Ramani<sup>2</sup>, Michael Brudno<sup>2</sup>, Shiva Senthil Kumar<sup>1</sup>, Rachid Drissi<sup>1\*</sup>, Phillip Dexheimer<sup>1</sup>, Ralph Salloun<sup>1</sup>, Lionel Chow<sup>1</sup>, Trent Hummel<sup>1</sup>, Charles Stevenson<sup>1</sup>, Qing Lu<sup>1</sup>, Blaise Jones<sup>1</sup>, David Witte<sup>1</sup>, Bruce Aronow<sup>1</sup>, Cynthia E. Hawkins<sup>2\*\*</sup>, Maryam Fouladi<sup>1\*\*\*</sup>

**Author Affiliations:** 1 – Cincinnati Children's Hospital Medical Center, Cincinnati, Ohio; 2 – The Hospital for Sick Children, Toronto, Canada

**Email of Corresponding Author:** maryam.fouladi@cchmc.org
