# Supplementary material for: Spatial genomic heterogeneity in diffuse intrinsic pontine and midline high-grade glioma: implications for diagnostic biopsy and targeted therapeutics
Source: Springer Nature journal article supplement (doi:10.1186/s40478-015-0269-0), 2016-01-04
Supplement: MOESM7 [file 25665856]

|           |                            |                              |                              |                            |                         |                             |
|-----------|----------------------------|------------------------------|------------------------------|----------------------------|-------------------------|-----------------------------|
| Patient 1 | Lt. Pons<br>Amp.           | Lt. Ant. Pons<br>4-6 copies  | Rt. Post. Pons<br>4-6 copies | Lt. Caudate<br>Amp.        |                         |                             |
| Patient 2 | Primary Pons<br>Amp.       | Lt. Ant. Pons<br>Amp.        | Rt. Post. Pons<br>Normal     | Brainstem<br>4-6 copies    | Cervical Cord<br>Amp.   |                             |
| Patient 3 | Primary Pons<br>4-6 copies | Lt. Ant. Pons<br>Normal      | Rt. Ant. Pons<br>Amp.        | Rt. Post. Pons<br>Amp.     | Lepto. Spread<br>Amp.   | Basal Ganglia<br>4-6 copies |
| Patient 7 | Primary Pons<br>4-6 copies | Rt. Post. Pons<br>Normal     | Lt. Ant. Pons<br>Normal      | Basal Ganglia<br>Normal    |                         |                             |
| Patient 8 | Rt. Pons<br>4-6 copies     | Rt. Post. Pons<br>4-6 copies | Lt. Pons<br>4-6 copies       | Rt. Thalamus<br>4-6 copies | Basal Ganglia<br>Normal | Frontal Lobe<br>Normal      |

#### Online Resource 7. FISH validation for PDGFRA copy number alterations

**Article Title:** Spatial genomic heterogeneity in diffuse intrinsic pontine and midline high-grade glioma: implications for diagnostic biopsy and targeted therapeutics

**Journal Name:** Acta Neuropathologica

**Author Names:** Lindsey M. Hoffman<sup>1</sup>, Mariko DeWitt<sup>1</sup>, Scott Ryall<sup>2</sup>, Pawel Buczkowicz<sup>2</sup>, James Leach<sup>1</sup>, Lili Miles<sup>1</sup>, Arun Ramani<sup>2</sup>, Michael Brudno<sup>2</sup>, Shiva Senthil Kumar<sup>1</sup>, Rachid Drissi<sup>1</sup>, Phillip Dexheimer<sup>1</sup>, Ralph Saloum<sup>1</sup>, Lionel Chow<sup>1</sup>, Trent Hummel<sup>1</sup>, Charles Stevenson<sup>1</sup>, Qing Lu<sup>1</sup>, Blaise Jones<sup>1</sup>, David Witte<sup>1</sup>, Bruce Aronow<sup>1</sup>, Cynthia E. Hawkins<sup>2\*</sup>, Maryam Fouladi<sup>1\*\*</sup>

**Author Affiliations:** 1 – Cincinnati Children's Hospital Medical Center, Cincinnati, Ohio; 2 – The Hospital for Sick Children, Toronto, Canada

**Email of Corresponding Author:** maryam.fouladi@cchmc.org
